# Supplementary material for: 2016 ESC/EAS Guidelines for the Management of Dyslipidaemias
Source: Oxford University Press journal article supplement (doi:10.1093/eurheartj/ehw272), 2016-08-27
Supplement: mmc1.pdf [file mmc1.pdf]

**Supplementary figure A A systematic review and meta-analysis of the therapeutic equivalence of statins**

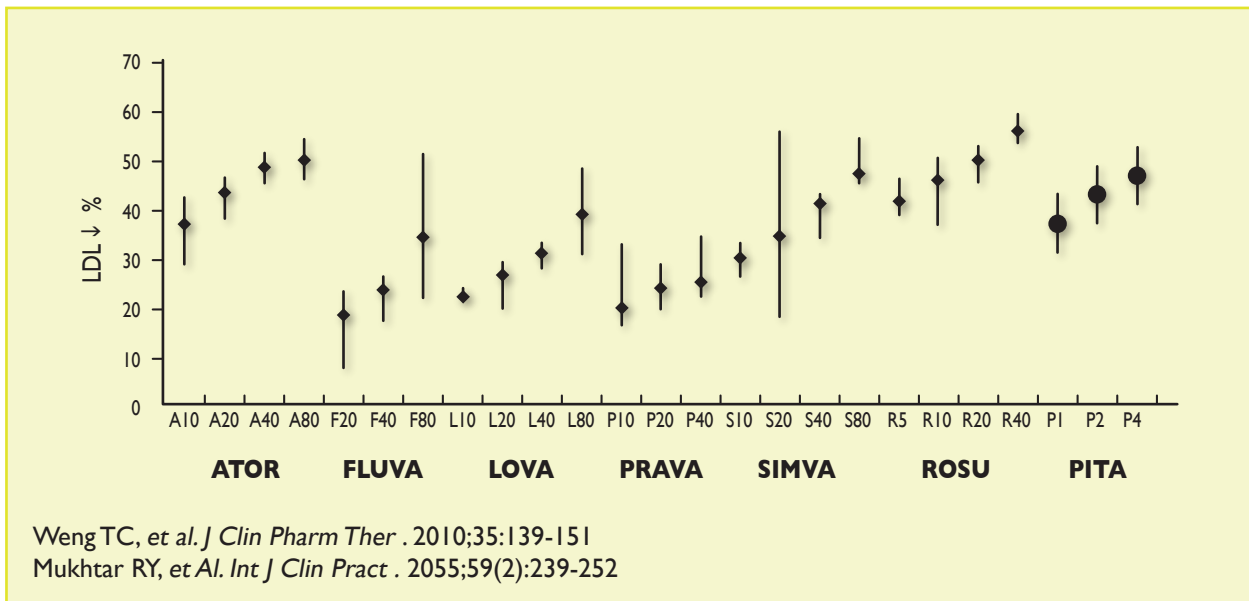

ATOR = atorvastatin; FLUVA = fluvastatin; LOVA = lovastatin; PRAVA = pravastatin; SIMVA = simvastatin; ROSU = rosuvastatin; PITA = pitavastatin.

**Supplementary Table A Percentage reduction of low-density lipoprotein-cholesterol (LDL-C) requested to achieve goals as a function of the starting value**

| Starting LDL-C |         | Reduction to reach LDL-C goal, % |                             |                           |
|----------------|---------|----------------------------------|-----------------------------|---------------------------|
| mmol/L         | ~mg/dL  | <1.8 mmol/L<br>(~70 mg/dL)       | <2.6 mmol/L<br>(~100 mg/dL) | <3 mmol/L<br>(~115 mg/dL) |
| >6.2           | >240    | >70                              | >60                         | >55                       |
| 5.2–6.2        | 200–240 | 65–70                            | 50–60                       | 40–55                     |
| 4.4–5.2        | 170–200 | 60–65                            | 40–50                       | 30–45                     |
| 3.9–4.4        | 150–170 | 55–60                            | 35–40                       | 25–30                     |
| 3.4–3.9        | 130–150 | 45–55                            | 25–35                       | 10–25                     |
| 2.9–3.4        | 110–130 | 35–45                            | 10–25                       | <10                       |
| 2.3–2.9        | 90–110  | 22–35                            | <10                         | –                         |
| 1.8–2.3        | 70–90   | <22                              | –                           | –                         |

**Supplementary figure B HIV-drug interaction database of the University of Liverpool**

| Lipid-Lowering Treatment Selector                                                                                                                                                                                                   |              |                |       |       |       |       |       |      |      |     |     |     |       |      |     |     |     |     |     |
|-------------------------------------------------------------------------------------------------------------------------------------------------------------------------------------------------------------------------------------|--------------|----------------|-------|-------|-------|-------|-------|------|------|-----|-----|-----|-------|------|-----|-----|-----|-----|-----|
| Charts revised August 2013. Full information available at <a href="http://www.hiv-druginteractions.org">www.hiv-druginteractions.org</a> and <a href="http://www.hiv-druginteractionslite.org">www.hiv-druginteractionslite.org</a> |              |                |       |       |       |       |       |      |      |     |     |     |       |      |     |     |     |     |     |
|                                                                                                                                                                                                                                     |              | ATV/r          | DRV/r | FPV/r | IDV/r | LPV/r | SQV/r | EFV  | ETV  | NVP | RPV | MVC | EVG/c | RAL  | ABC | FTC | 3TC | TDF | ZDV |
| Statins                                                                                                                                                                                                                             | Atorvastatin | ↑              | ↑     | ↑153% | ↑     | ↑490% | ↑     | ↓43% | ↓37% | ↓   | ↔   | ↔   | ↑     | ↔    | ↔   | ↔   | ↔   | ↔   | ↔   |
|                                                                                                                                                                                                                                     | Fluvastatin  | ↔              | ↔     | ↔     | ↑     | ↔     | ↑     | ↑    | ↑    | ↔   | ↔   | ↔   | ↔     | ↔    | ↔   | ↔   | ↔   | ↔   | ↔   |
|                                                                                                                                                                                                                                     | Lovastatin   | ↑              | ↑     | ↑     | ↑     | ↑     | ↑     | ↓    | ↓    | ↓   | ↔   | ↔   | ↑     | ↔    | ↔   | ↔   | ↔   | ↔   | ↔   |
|                                                                                                                                                                                                                                     | Pravastatin  | ↔              | ↑81%  | ↔     | ↑     | ↔     | ↓50%  | ↓44% | ↓    | ↔   | ↔   | ↔   | ↔     | ↔    | ↔   | ↔   | ↔   | ↔   | ↔   |
|                                                                                                                                                                                                                                     | Rosuvastatin | ↑213%          | ↑48%  | ↑8%   | ↑     | ↑107% | ↑     | ↔    | ↑    | ↔   | ↔   | ↔   | ↔     | ↑48% | ↔   | ↔   | ↔   | ↔   | ↔   |
|                                                                                                                                                                                                                                     | Simvastatin  | ↑              | ↑     | ↑     | ↑     | ↑     | ↑     | ↓68% | ↓    | ↓   | ↔   | ↔   | ↔     | ↑    | ↔   | ↔   | ↔   | ↔   | ↔   |
| Fibrates                                                                                                                                                                                                                            | Bezafibrate  | ↔              | ↔     | ↔     | ↔     | ↔     | ↔     | ↔    | ↔    | ↔   | ↔   | ↔   | ↔     | ↔    | ↔   | ↔   | ↔   | ↔   | ↔   |
|                                                                                                                                                                                                                                     | Clofibrate   | ↔              | ↔     | ↔     | ↔     | ↔     | ↔     | ↔    | ↔    | ↔   | ↔   | ↔   | ↔     | ↔    | ↔   | ↔   | ↔   | ↔   | ↑↑  |
|                                                                                                                                                                                                                                     | Fenofibrate  | ↔              | ↔     | ↔     | ↔     | ↔     | ↔     | ↔    | ↔    | ↔   | ↔   | ↔   | ↔     | ↔    | ↔   | ↔   | ↔   | ↔   | ↔   |
|                                                                                                                                                                                                                                     | Gemfibrozil  | ↓              | ↓     | ↓     | ↓     | ↓41%  | ↓     | ↔    | ↔    | ↔   | ↔   | ↔   | ↔     | ↑    | ↔   | ↔   | ↔   | ↔   | ↔   |
|                                                                                                                                                                                                                                     | Ezetimibe    | ↑ <sup>a</sup> | ↔     | ↔     | ↔     | ↔     | ↔     | ↔    | ↔    | ↔   | ↔   | ↔   | ↔     | ↔    | ↔   | ↔   | ↔   | ↔   | ↔   |

**Colour Legend**

- No clinically significant interaction expected.
- These drugs should not be coadministered.
- Potential interaction which may require a dosage adjustment or close monitoring.
- Potential interaction predicted to be of weak intensity (<2 fold ↑AUC or <50% ↓AUC). No *a priori* dosage adjustment is recommended.

**Text Legend**

- ↑ Potential increased exposure of the lipid-lowering drug
- ↓ Potential decreased exposure of the lipid-lowering drug
- ↔ No significant effect
- ↑ Potential increased exposure of HIV drug
- ↓ Potential decreased exposure of HIV drug

<sup>a</sup>Unboosted atazanavir

Numbers refer to increased or decreased AUC of the lipid-lowering drug as observed in drug-drug interaction studies.

(From Liverpool HIV Pharmacology Group, University of Liverpool)

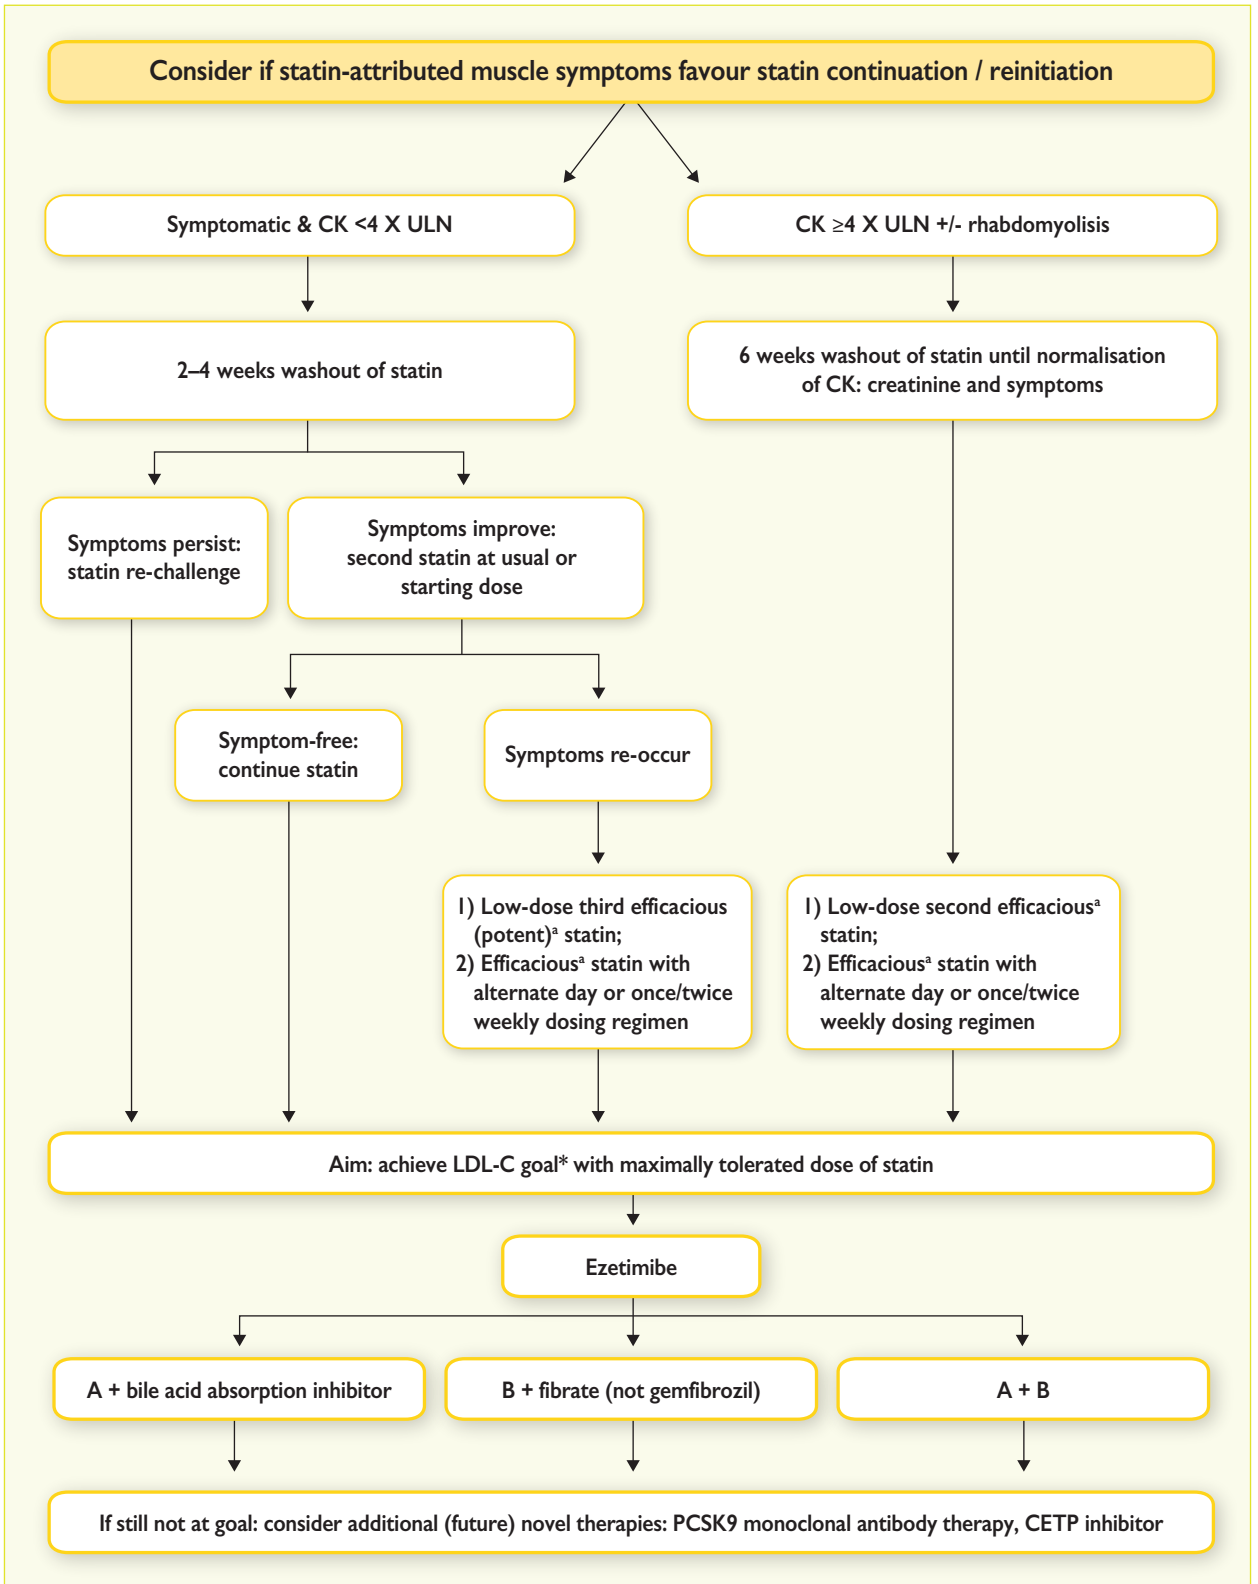

CETP = cholesteryl ester transfer protein; CK = creatine kinase; LDL-C= low-density lipoprotein cholesterol; PCSK9 = proprotein convertase subtilisin/kexin type 9; ULN = upper limit of the normal range.

<sup>a</sup>Efficacious statin such as atorvastatin or rosuvastatin.

<sup>\*</sup>Reiner Z et al. (2011).
